# Supplementary material
Source: PubMed Central journal article supplement (PMC3259641)
Supplement: supp_M709597200_Suppdata.pdf [file supp_M709597200_Suppdata.pdf]

## Supplemental Figures:

**Figure S1. Characterization of Cy3.5-apoA-I.** **A)** ABCA1-expressing BHK cells were incubated with 5  $\mu\text{g/ml}$  Cy3.5-apoA-I alone (i) or 5  $\mu\text{g/ml}$  Cy3.5-apoA-I plus 25  $\mu\text{g/ml}$  unlabeled apoA-I as competitor (ii) for 30 min and analyzed by confocal microscopy. Cy3.5-apoA-I was also analyzed in non-induced ABCA1-BHK (iii) and induced Mock-BHK (iv) cells. **B)** RAW macrophages uninduced (ii) or induced (i) with 0.3 mM 8Br-cAMP for 20 h to express endogenous ABCA1 were submitted to Cy3.5apoA-I incubation and revealed as in **A)**. **C)** Mock- and ABCA1-BHK cells were labeled with 1  $\mu\text{Ci/ml}$   $^3\text{H}$ -cholesterol for 24 h followed by 20 h mifepristone induction. Cholesterol efflux was performed using 5  $\mu\text{g/ml}$  of either apoA-I or Cy3.5-apoA-I for 6 h. **D)** Cy3.5-apoA-I generates nascent HDL particles of sizes comparable to  $^{125}\text{I}$ -apoA-I, as analyzed by 2D-gels. After 2h of incubation with either 5 $\mu\text{g/ml}$  Cy3.5-apoA-I or  $^{125}\text{I}$ -apoA-I, media were concentrated and loaded on 2D gels. Cy3.5-fluorescence was detected using a Typhoon phosphoimager while  $^{125}\text{I}$ -radioactivity was directly revealed by autoradiography.

**Figure S2. Native and Cy3.5-labeled apoA-I reach the lysosome.** **A)** ABCA1-expressing BHK cells were co-incubated with 5  $\mu\text{g/ml}$  native apoA-I and 0.1 $\mu\text{M}$  LysoTracker Red for 1 h, followed by detection using a primary antibody and an Alexa488-coupled secondary antibody (green). **B)** Induced RAW264.7 macrophages were co-incubated with 5  $\mu\text{g/ml}$  Cy3.5-apoA-I and 0.1  $\mu\text{M}$  LysoTracker Green for 5 min, followed by a 1 h chase with LysoTracker Green. **C)** Cy3.5-apoA-I colocalizes with lysotracker in BHK cells expressing ABCA1 (BHK-ABCA1), in human skin fibroblasts induced with 22(R)-hydroxycholesterol and 9-*cis*-retinoic acid (HSF), in RAW macrophages induced with 8-Br-cAMP (RAW), and in HepG2 cells (HepG2) after 1h of incubation. The percentage of colocalization was determined as in Figure 2. Please note that mock-transfected BHK cells, uninduced human skin fibroblasts, induced skin fibroblasts from a Tangier patient, and uninduced RAW macrophages failed to bind and internalize significant amount of Cy3.5-apoA-I (not shown).

**Figure S3. Sucrose treatment reversibly blocks endocytosis in BHK cells.** **A)** ABCA1-expressing BHK cells were incubated for 30 min with either 5  $\mu\text{g/ml}$  Cy3.5-apoA-I (*first column*), 10  $\mu\text{g/ml}$  Alexa488-transferrin (*second column*), or 5 mg/ml FITC-Dextran (*third column*) in the absence (*first row*) or presence (*second row*) of 250 mM sucrose. **B)** Cells incubated with sucrose for 30 min were washed and incubated for 5, 30 or 120 min in the presence of 5  $\mu\text{g/ml}$  Cy3.5-apoA-I to test for the ability of cells to recover from the treatment. As shown, the endocytosis of Cy3.5-apoA-I resumed after removal of sucrose. **C)**  $^3\text{H}$ -cholesterol efflux was tested for the indicated times after the removal of sucrose from the medium.

**Figure S4. Cytochalasin D does not affect cholesterol efflux in RAW macrophages.**  $^3\text{H}$ -cholesterol labeled uninduced or induced (+cAMP) RAW cells were pre-incubated in DMEM without or with (+CytD) 6  $\mu\text{M}$  cytochalasin D for 15 min. Cholesterol efflux was performed by incubation with 5  $\mu\text{g/ml}$  of apoA-I with or without 6  $\mu\text{M}$  cytochalasin D for up to 1 h.

**A**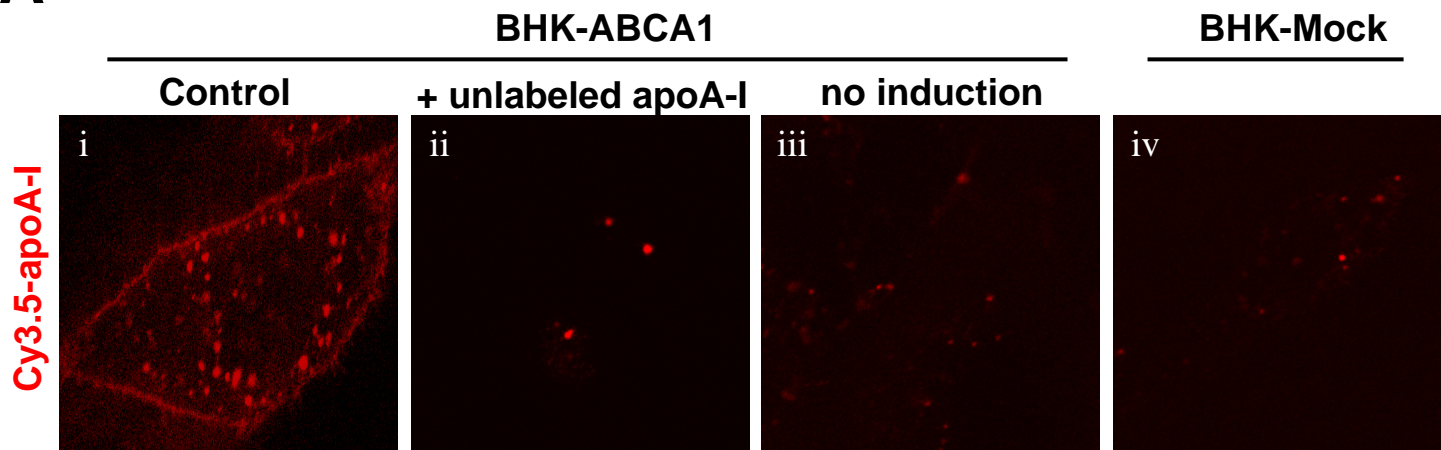**B**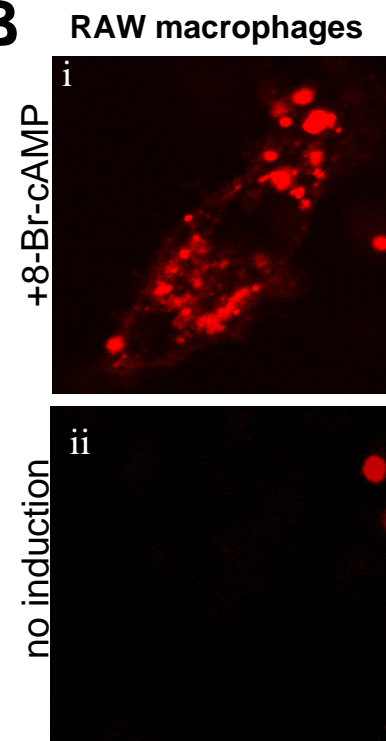**C**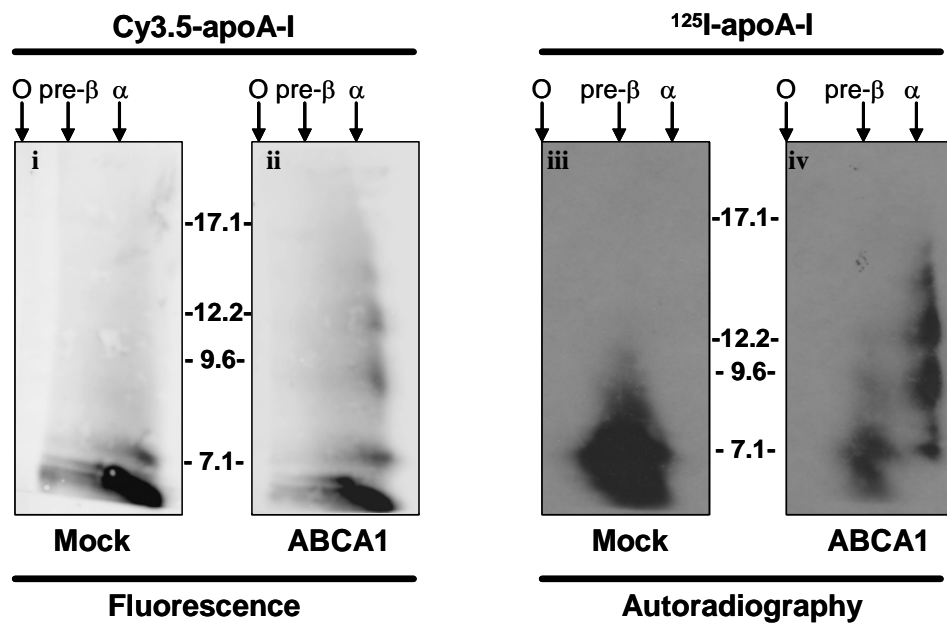**D**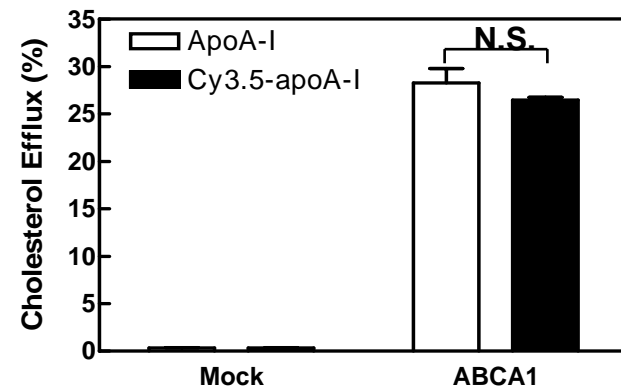

Figure S1, Denis &amp; al.

**A**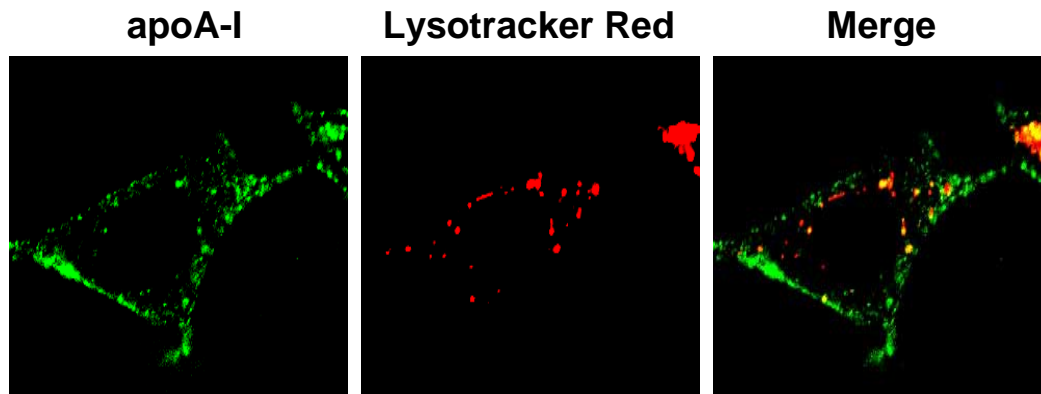**B**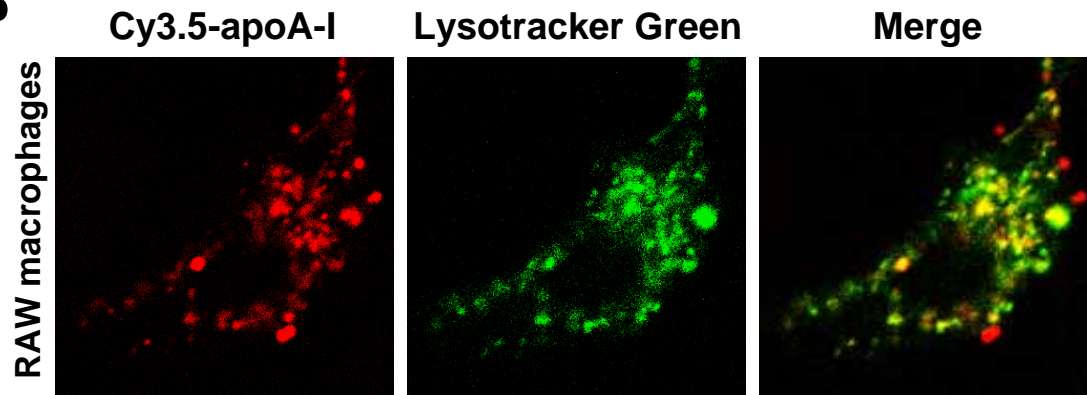**C**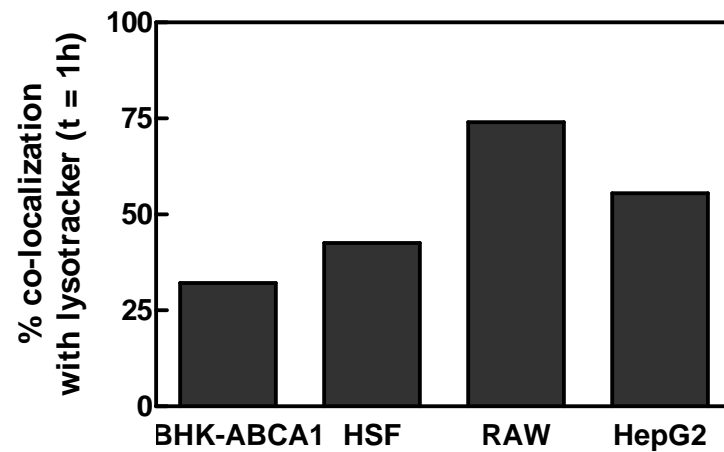

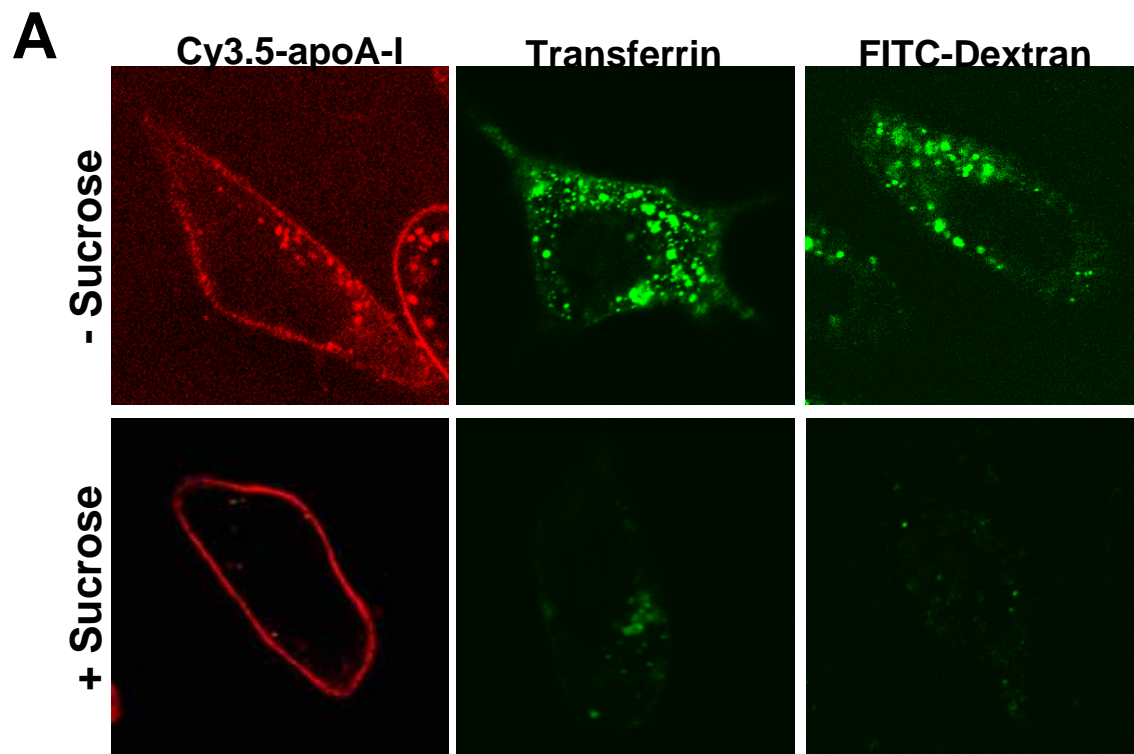

**B**

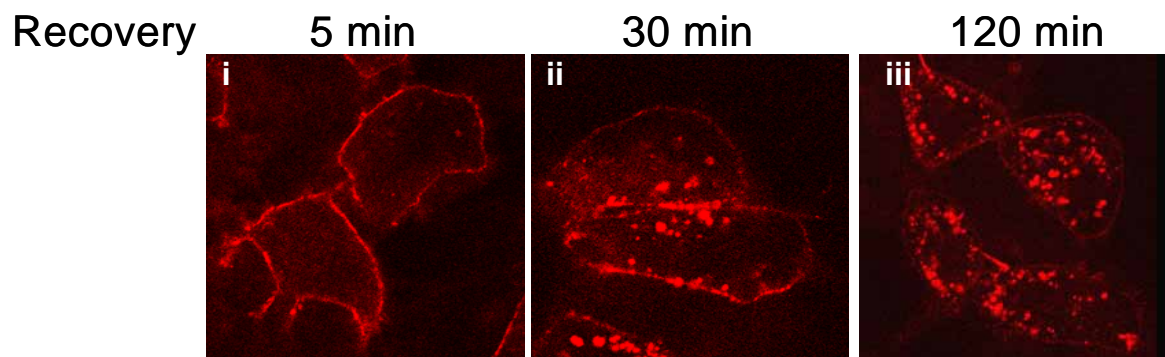

**C**

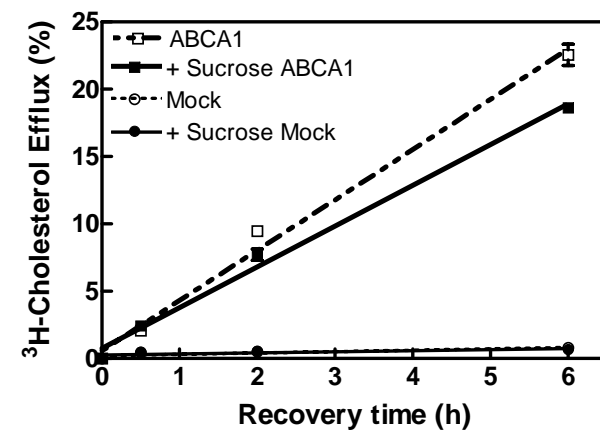

Figure S3, Denis & al.

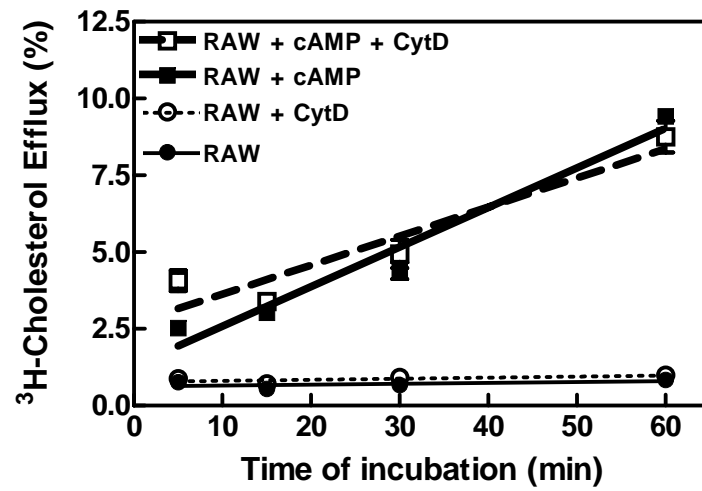

Figure S4, Denis & al.
